# Supplementary material
Source: publisher figshare collection journal article supplement (https://frontiersin.figshare.com/ndownloader/files/22873322)
Supplement: Supplementary file [file 22873322]

**Table SI:** Bacterial strains and plasmids

|                                                          | Relevant characteristics                                                                                                                                                                                                                                                  | Source                     |
|----------------------------------------------------------|---------------------------------------------------------------------------------------------------------------------------------------------------------------------------------------------------------------------------------------------------------------------------|----------------------------|
| <b>Strains</b>                                           |                                                                                                                                                                                                                                                                           |                            |
| <i>E. coli</i>                                           |                                                                                                                                                                                                                                                                           |                            |
| JM109                                                    | <i>el4</i> ( <i>McrA</i> <sup>-</sup> ), <i>recA1</i> , <i>endA1</i> <i>gyrA69</i> , <i>thi-1</i> , <i>hsdR17</i> ( <i>rk-mk</i> <sup>+</sup> ) <i>supE44</i> , <i>reA1</i> , $\Delta$ ( <i>lac-proAB</i> ) [ <i>F'</i> <i>traD36</i> , <i>proAB</i> , <i>lacIZAM15</i> ] | Stratagene                 |
| <i>R. gelatinosus</i>                                    |                                                                                                                                                                                                                                                                           |                            |
| Strain S1                                                | Wild-type                                                                                                                                                                                                                                                                 | (Uffen, 1976)              |
| $\Delta$ <i>cadA</i>                                     | <i>cadA</i> deleted strain ( <i>AcadA::Tp</i> )                                                                                                                                                                                                                           | This work                  |
| <i>cadR</i> <sup>-</sup>                                 | <i>cadR</i> inactivated strain ( <i>cadR::K</i> )                                                                                                                                                                                                                         | This work                  |
| <i>copA</i> <sup>-</sup>                                 | <i>copA</i> inactivated strain ( <i>copA::Tn5,Km</i> )                                                                                                                                                                                                                    | (Azzouzi et al., 2013)     |
| $\Delta$ <i>copI</i>                                     | <i>copI</i> deleted strain ( <i>copI::Km</i> )                                                                                                                                                                                                                            | (Durand et al., 2015)      |
| $\Delta$ <i>cadA</i> $\Delta$ <i>copI</i>                | <i>cadA</i> ( <i>AcadA::Tp</i> ) and <i>copI</i> ( <i>copI::Km</i> ) deleted strain                                                                                                                                                                                       | This work                  |
| $\Delta$ <i>cadA</i> $\Delta$ <i>copA</i> <sup>-</sup>   | <i>cadA</i> ( <i>AcadA::Tp</i> ) and <i>copA</i> ( <i>copA::Km</i> ) deleted strain                                                                                                                                                                                       | This work                  |
| <i>copA-H</i> <sub>6</sub>                               | strain bearing the 6-his tagged <i>copA</i> gene on the chromosome                                                                                                                                                                                                        | (Azzouzi et al., 2013)     |
| $\Delta$ <i>cadA</i> $\Delta$ <i>copA-H</i> <sub>6</sub> | <i>cadA</i> deleted strain ( <i>AcadA::Tp</i> ) bearing the 6-his tagged <i>copA</i> gene on the chromosome                                                                                                                                                               | This work                  |
| <i>hemN-H</i> <sub>6</sub>                               | strain bearing the 6-his tagged <i>hemN</i> gene on the chromosome                                                                                                                                                                                                        | This work                  |
| <b>Plasmids</b>                                          |                                                                                                                                                                                                                                                                           |                            |
| pGEM-T                                                   | Cloning vector (Ap <sup>r</sup> )                                                                                                                                                                                                                                         | Promega                    |
| pUC4K                                                    | Plasmid bearing the Km cartridge (Ap <sup>r</sup> Km <sup>r</sup> )                                                                                                                                                                                                       | Pharmacia                  |
| p34S-Tp                                                  | Plasmid bearing the Tp cartridge (Ap <sup>r</sup> Tp <sup>r</sup> )                                                                                                                                                                                                       | (Dennis and Zylstra, 1998) |
| pBBR1MCS-3                                               | (mob <sup>+</sup> , Tc <sup>r</sup> ) expression vector                                                                                                                                                                                                                   | (Kovach et al., 1994)      |
| pB106                                                    | pBBR1MSC-4 with 6.6 kb insert containing the <i>cadRA</i> genes isolated by PCR from WT genomic DNA library                                                                                                                                                               | This work                  |
| pG <i>cadA</i>                                           | pGEMT + 1.8 kb PCR fragment containing <i>cadA</i>                                                                                                                                                                                                                        | This work                  |
| pG <i>cadA::Tp</i>                                       | Tp cartridge cloned into NarI sites deleting 0.8 kb of <i>cadA</i> in pG <i>cadA</i>                                                                                                                                                                                      | This work                  |
| pG <i>cadR</i>                                           | pGemT + 1Kb PCR fragment containing <i>cadR</i>                                                                                                                                                                                                                           | This work                  |
| pG <i>cadRK</i>                                          | Km cartridge cloned into stuI site inactivating <i>cadR</i> in pG <i>cadR</i>                                                                                                                                                                                             | This work                  |
| pBK <i>CadA</i>                                          | 6.6 kb KpnI-SacI fragment from pB106 in pBBR1MCS-2                                                                                                                                                                                                                        | This work                  |
| p <i>copA-H</i> <sub>6</sub>                             | <i>copA</i> gene cloned in pET-28b plasmid at the EcoRI-XhoI site                                                                                                                                                                                                         | (Azzouzi et al., 2013)     |
| p <i>hemN-H</i> <sub>6</sub>                             | <i>hemN</i> gene cloned in pET-28b plasmid at the NdeI-XhoI site                                                                                                                                                                                                          | This work                  |

Ap<sup>r</sup>, ampicillin resistant, Km<sup>r</sup>, kanamycin resistant, Tp<sup>r</sup>, trimethoprim resistant, Tc<sup>r</sup>, tetracyclin resistant.

**Table SII:** Primers used in this work

| Primer    | 5' to 3' Sequence          |
|-----------|----------------------------|
| cadAF1    | GAACGCACGCTGCGCCTGGA       |
| cadAR1    | CATCAAGGCGGTGTTTCCT        |
| cadRF1    | ACGACGACGAGGAGTTCGTCTGA    |
| cadRR1    | GATCTGCCCTTCCTCAGACGGCGCAG |
| hemN-NdeI | GGATGAATCATATGGACACGATT    |
| hemN-XhoI | CCCGTGCCGGCTCGAGATGATGCG   |

## References

- Azzouzi, A., Steunou, A.S., Durand, A., Khalfaoui-Hassani, B., Bourbon, M.L., Astier, C. et al. (2013) Coproporphyrin III excretion identifies the anaerobic coproporphyrinogen III oxidase HemN as a copper target in the Cu<sup>+</sup>-ATPase mutant *copA*<sup>-</sup> of *Rubrivivax gelatinosus*. *Mol Microbiol* **88**: 339-351.
- Dennis, J.J., and Zylstra, G.J. (1998) Plasmids: modular self-cloning minitransposon derivatives for rapid genetic analysis of gram-negative bacterial genomes. *Appl Environ Microbiol* **64**: 2710-2715.
- Durand, A., Azzouzi, A., Bourbon, M.L., Steunou, A.S., Liotenberg, S., Maeshima, A. et al. (2015) c-type cytochrome assembly is a key target of copper toxicity within the bacterial periplasm. *MBio* **6**: e01007-01015.
- Kovach, M.E., Phillips, R.W., Elzer, P.H., Roop II, R.M., and Peterson, K.M. (1994) pBBR1MCS: a broad-host-range cloning vector. *BioTechniques* **16**: 800-802.
- Uffen, R.L. (1976) Anaerobic growth of a *Rhodopseudomonas* species in the dark with carbon monoxide as sole carbon and energy substrate. *Proc Natl Acad Sci USA* **73**: 3298-3302.
